# Supplementary material for: dRNA-Seq Reveals Genomewide TSSs and Noncoding RNAs of Plant Beneficial Rhizobacterium Bacillus amyloliquefaciens FZB42
Source: PLoS One. 2015 Nov 5;10(11):e0142002. doi: 10.1371/journal.pone.0142002 (PMC4634765; doi:10.1371/journal.pone.0142002)
Supplement: S1 Table — (XLSX) [file pone.0142002.s012.xlsx]

## Sheet: S1
S1 Table: Growth conditions and distribution of sequencing reads mapped to B. amyloliquefaciens FZB42 genome in each library.
Condition/ Sample Name*	Growth phase	Medium supplemen-tation	Aligned reads (percentage ‡)		Uniquely aligned reads (§)
			TEX-	TEX+	TEX-		TEX+
1CM#6hr	MSP	--	3881436 (93.5%)	3596106 (89.4%)	103543 (2.67%)		283727 (7.89%)
RE#6hr	MSP	RE	3963412 (93.3%)	3878981 (88.4%)	109435 (2.8%)		333075 (8.6%)
SE#6hr	ESP	SE	3240927 (94.3%)	3831416 (90.4%)	81369 (2.5%)		252409 (6.6%)
RS#6hr	ESP	RS	4220439 (92.9%)	3196882 (88.3%)	126088 (3.0%)		262871 (8.2%)
SE#9hr	MSP	SE	8456595 (91.1%)	53176623 (90.2%)	368029 (4.4%)		5541585 (10.4%)
RS#9hr	MSP	RS	10298656 (91.8%)	9222428 (91.8%)	577083 (5.6%)		843709 (9.2%)
