# Supplementary material for: dRNA-Seq Reveals Genomewide TSSs and Noncoding RNAs of Plant Beneficial Rhizobacterium Bacillus amyloliquefaciens FZB42
Source: PLoS One. 2015 Nov 5;10(11):e0142002. doi: 10.1371/journal.pone.0142002 (PMC4634765; doi:10.1371/journal.pone.0142002)
Supplement: S2 Table — (XLSX) [file pone.0142002.s013.xlsx]

## Sheet: S2
S2 Table: Statistics of numbers and percentages of all categories TSSs detected in various growth condition
TSS prediction statistics:	All	Primary	Secondary	Internal	Antisense	Orphan
Complete number of detected TSS:	4877	2074(43%)	727(15%)	1323(27%)	1242(25%)	194(4%)
Number of TSS detected in all conditions:	1168	831(71%)	88(8%)	189(16%)	152(13%)	55(5%)
Number of TSS detected in at least 2 but not all conditions:	3132	1163(37%)	534(17%)	889(28%)	880(28%)	118(4%)
Number of TSS detected in 1CM#6hr:	2012	1218(61%)	253(13%)	391(19%)	343(17%)	83(4%)
Number of TSS detected in RE#6hr:	2280	1323(58%)	307(13%)	464(20%)	403(18%)	95(4%)
Number of TSS detected in SE#6hr:	2702	1490(55%)	325(12%)	577(21%)	559(21%)	99(4%)
Number of TSS detected in RS#6hr:	2850	1510(53%)	359(13%)	650(23%)	599(21%)	126(4%)
Number of TSS detected in RS#9hr:	3533	1744(49%)	470(13%)	858(24%)	790(22%)	148(4%)
Number of TSS detected in SE#9hr:	4535	2033(45%)	578(13%)	1194(26%)	1185(26%)	173(4%)
Number of TSS only detected in 1CM#6hr:	10	1(10%)	5(50%)	2(20%)	0(0%)	2(20%)
Number of TSS only detected in RE#6hr:	8	1(13%)	4(50%)	1(13%)	2(25%)	0(0%)
Number of TSS only detected in SE#6hr:	11	1(9%)	5(45%)	4(36%)	2(18%)	0(0%)
Number of TSS only detected in RS#6hr:	9	0(0%)	4(44%)	1(11%)	4(44%)	1(11%)
Number of TSS only detected in RS#9hr:	93	6(6%)	28(30%)	54(58%)	14(15%)	4(4%)
Number of TSS only detected in SE#9hr:	446	71(16%)	59(13%)	183(41%)	188(42%)	14(3%)
Number of TSS only missing in 1CM#6hr:	264	150(57%)	29(11%)	50(19%)	55(21%)	11(4%)
Number of TSS only missing in RE#6hr:	51	32(63%)	7(14%)	7(14%)	8(16%)	1(2%)
Number of TSS only missing in SE#6hr:	92	45(49%)	11(12%)	25(27%)	20(22%)	4(4%)
Number of TSS only missing in RS#6hr:	96	63(66%)	13(14%)	9(9%)	21(22%)	2(2%)
Number of TSS only missing in RS#9hr:	104	53(51%)	12(12%)	34(33%)	20(19%)	1(1%)
Number of TSS only missing in SE#9hr:	2	0(0%)	1(50%)	0(0%)	1(50%)	0(0%)
		0
