# Supplementary material for: dRNA-Seq Reveals Genomewide TSSs and Noncoding RNAs of Plant Beneficial Rhizobacterium Bacillus amyloliquefaciens FZB42
Source: PLoS One. 2015 Nov 5;10(11):e0142002. doi: 10.1371/journal.pone.0142002 (PMC4634765; doi:10.1371/journal.pone.0142002)
Supplement: S3 Table — (XLSX) [file pone.0142002.s014.xlsx]

## Sheet: S3
S3 Table: The 10 primary TSSs randomly selected to check robustness of TSSs identification.
Left gene	Right gene	Orientation	bp distant from the downstream gene	Sequence (5'-->3')	Length	Sequence countepart in Bacillus subtilis 168	Reference
glpK	glpD	>>>	112	AAGTTAATAGGAACGGTCCTGAGATGAGGAGAGACCACAGCACCAAAGTGATAACTGCGCTTTGGCTGTTGTGGTCTCTTTTTCT	85	AAGTTAATAAGAACGGTC	PMID: 1809833
yebA	guaA	>>>	126	ATGTTAAATGGGAGCCCGGGAGCGTTAAAAAGCCGGGCTTCCGTACAAGTCTTGCGCGACAGAGGGCTGAACGTTTGTCCTCCGTTTTTT	90	ATATTATCGGAGTCTGGG	PMID: 17962296
yjlB	yjlC	>>>	256	GTAAATCAAATTGGGGTTTTTTATGTTTGCTATTTTCAGAGAGGAAAAAGAAATTTTGACTTATTCAATTGTTTTTGTTGATATAAAAATAATACTGGATATGGCAAAGTGAAAAACTGGGTAGTAAACATTTATTTTT	139	gtaatcgaattggagttttttgtgt	PMID: 17015645
acpS	ydcC	>>>	125	GCATTAAGGGAGACAAGTTGTTTGAGGCTTTTATGGTACGCGTCCGTCCGTTCAGGGCGTACCGTTAAAGTCAAACAAGCGATTTCTTCCCTTTAC	96	GCATTAAGGgagacaagttgtttga	PMID: 17962296
divIB	ftsA	>>>	140	AAACATAAATTGTGAGAAATCAGATAAGAATTTGTTGATGCTGTTGTTTTTGTTACACACTTGTAAAGCCACATTCATTGTATTGTTGTTCCGC	94	ATAAACATAAAATGTGAA	PMID: 10878122
iolA	iolR	<<>	321	aagaaatgaccaaaacataacctgtaaaatcaaaagtgaaagatgtaaccgtttgctttttccggtacatgaccaagttttacatggaaagattgg	96	AAGAAATGACCAAAAAGTAAC	PMID: 17962296
trpE	aroH	<<<	211	agcttagaaatacacaagagtgtgtatagagctggtaagtaagatattgaacagttgagtttagaatagggtagcagagaatgagtttagctgagctgagataaacacgtttttattctgcccaaaagaagcctttcttttgggtttatttctt	154	AGCTTAGAaatacacaagagtgtgt	PMID: 6436812, PMID: 2422155
ycgB	amyE	>>>	114	AAGCGTTAACAGAATTCTCCAGTCTTCACAACAGTTGAAAGGAGCTGAAGAAAGAGTAAGAGGAATTTTTGACTCCGCAGTCAGTCTTCAAAAATC	96	aagcgttaacaaaattctccagtct	PMID: 17962296
yfhP	yfhQ	<<>	161	acgttacgataatatgttacattaaatagtgataaagaaaaagcggaaacatatgagaacggcggataaacgccatgattgggcaaacagaaaatg	96	cacagtacgataatatgttacatta	PMID: 17962296
bglP	RBAM_036370	<<>	103	atcaacccaatatcattcacccaggattgttactgcaaatcgcaggcaaaacctaaattgcgtcagacagggggagactcccgtgttctgtgcagtttgggttttttttt	110	acaaacaaataaaacgacccgtcag	PMID: 17962296
