# Supplementary material for: dRNA-Seq Reveals Genomewide TSSs and Noncoding RNAs of Plant Beneficial Rhizobacterium Bacillus amyloliquefaciens FZB42
Source: PLoS One. 2015 Nov 5;10(11):e0142002. doi: 10.1371/journal.pone.0142002 (PMC4634765; doi:10.1371/journal.pone.0142002)
Supplement: S7 Table — (XLSX) [file pone.0142002.s018.xlsx]

## Sheet: S7
S7 Table: The significantly regulated mRNA genes by different growth phase.
	Sigma factors with star were those predicted using the online tool [1]
	DIV/0!:infinite
	[1]:Moszer, I., et al., SubtiList: the reference database for the Bacillus subtilis genome. Nucleic Acids Res, 2002. 30(1): p. 62-5.
Gene	Fold change_RE8/RE3	Fold change_RS8/RS3	Product	Function_category 1	Function_category 2	Sigma factor
tagO	2.64012	2.80033	putative undecaprenyl-phosphate N-acetylglucosaminyl 1-phosphate transferase TagO	cell envelope and cellular processes	Cell wall	SigA*
yfnG	DIV/0!	184.685	putative CDR-glucose 4,6-dehydratase YfnG	cell envelope and cellular processes	Cell wall	TSS not determined in this study
murAA	2.67729	14.031	UDP-N-acetylglucosamine 1-carboxyvinyltransferase MurAA	cell envelope and cellular processes	Cell wall	Not Detected
gerPF	49.3904	20.7607	spore germination protein GerPF	cell envelope and cellular processes	Germination	SigE* ,SigK*
ffh	2.67471	2.21978	signal recognition particle-like (SRP) componentFfh	cell envelope and cellular processes	Protein secretion	TSS not determined in this study
secY	5.69389	2.90522	preprotein translocase subunit SecY	cell envelope and cellular processes	Protein secretion	TSS not determined in this study
phoR	2.3777	2.33218	alkaline phosphatase synthesis sensor protein PhoR	cell envelope and cellular processes	Sensors (signal transduction)	TSS not determined in this study
rapC	2.92069	2.29387	response regulator aspartate phosphatase RapC	cell envelope and cellular processes	Sporulation	SigB*
coxA	55.2138	43.5762	spore cortex protein CoxA	cell envelope and cellular processes	Sporulation	SigF*, SigG*
cotE	4.61807	3.94483	outer spore coat protein CotE	cell envelope and cellular processes	Sporulation	SigE,SigK
spoIVB	2.56361	3.52138	stage IV sporulation protein SpoIVB	cell envelope and cellular processes	Sporulation	SigF,SigG
sspN	21.27	15.436	small acid-soluble spore protein SspN	cell envelope and cellular processes	Sporulation	SigF,SigG
sspA	2.34172	2.45966	small acid-soluble spore protein SspA	cell envelope and cellular processes	Sporulation	SigG
sspB	2.62374	5.06531	small acid-soluble spore protein (beta-type SASP) SspB	cell envelope and cellular processes	Sporulation	SigG
sspD	48.8087	16.5615	small acid-soluble spore protein (alpha/beta-type SASP) SspD	cell envelope and cellular processes	Sporulation	SigG
sspE	35.5286	11.9147	putative small acid-soluble spore protein SspE	cell envelope and cellular processes	Sporulation	SigG
sspF	75.4136	73.6355	small acid-soluble spore protein (alpha/beta-type SASP) SspF	cell envelope and cellular processes	Sporulation	SigG
sspI	4.55101	3.09705	small acid-soluble spore protein SspI	cell envelope and cellular processes	Sporulation	SigG
sspJ	40.7435	30.2026	small acid-soluble spore protein SspJ	cell envelope and cellular processes	Sporulation	SigG
sspK	66.0455	78.8874	small acid-soluble spore protein SspK	cell envelope and cellular processes	Sporulation	SigG
sspM	8.43134	3.1367	small, acid-soluble spore protein SspM	cell envelope and cellular processes	Sporulation	SigG
phrC	3.24266	2.06854	phosphatase (RapC) regulator/ompetence and sporulation stimulating factor (CSF) PhrC	cell envelope and cellular processes	Sporulation	SigH
cgeA	DIV/0!	218.44	spore maturation protein CgeA	cell envelope and cellular processes	Sporulation	SigK
cotA	488.128	144.835	spore coat protein (outer) CotA	cell envelope and cellular processes	Sporulation	SigK
cotD	DIV/0!	255.513	spore coat protein (inner) CotD	cell envelope and cellular processes	Sporulation	SigK
cotG	DIV/0!	258.655	spore coat protein G (CotG)	cell envelope and cellular processes	Sporulation	SigK
cotV	143.333	942.346	spore coat protein (insoluble fraction) CotV	cell envelope and cellular processes	Sporulation	SigK
cotX	199.861	801.271	spore coat protein (insoluble fraction) CotX	cell envelope and cellular processes	Sporulation	SigK
cotY	16.0962	100.571	spore coat protein CotY	cell envelope and cellular processes	Sporulation	SigK
spsA	11.625	16.9572	spore coat polysaccharide synthesis protein SpsA	cell envelope and cellular processes	Sporulation	SigK
spsL	20.3119	8.42796	spore coat polysaccharide synthesis protein SpsL	cell envelope and cellular processes	Sporulation	TSS not determined in this study
spsI	7.44342	10.5383	spore coat polysaccharide synthesis protein SpsI	cell envelope and cellular processes	Sporulation	TSS not determined in this study
tlp	21.6532	13.1235	small acid-soluble spore protein (thioredoxin-like protein) Tlp	cell envelope and cellular processes	Sporulation	TSS not determined in this study
spsK	10.243	13.6977	spore coat polysaccharide synthesis protei SpsK	cell envelope and cellular processes	Sporulation	TSS not determined in this study
spsF	DIV/0!	19.6599	spore coat polysaccharide synthesis protein SpsF	cell envelope and cellular processes	Sporulation	TSS not determined in this study
spsG	DIV/0!	38.8591	spore coat polysaccharide synthesis protein SpsG	cell envelope and cellular processes	Sporulation	TSS not determined in this study
spsD	40.1127	42.9053	spore coat polysaccharide synthesis protein SpsD	cell envelope and cellular processes	Sporulation	TSS not determined in this study
spoVFB	DIV/0!	48.4253	dipicolinate synthase subunit B (SpoVFB)	cell envelope and cellular processes	Sporulation	TSS not determined in this study
cotZ	12.0338	49.1278	spore coat protein CotZ (insoluble fraction) CotZ	cell envelope and cellular processes	Sporulation	TSS not determined in this study
spsC	DIV/0!	92.4481	spore coat polysaccharide synthesis protein SpsC	cell envelope and cellular processes	Sporulation	TSS not determined in this study
spsB	136.843	92.5378	spore coat polysaccharide synthesis protein SpsB	cell envelope and cellular processes	Sporulation	TSS not determined in this study
cgeB	DIV/0!	205.995	spore maturation protein CgeB	cell envelope and cellular processes	Sporulation	TSS not determined in this study
cotW	DIV/0!	DIV/0!	spore coat protein (insoluble fraction) CotW	cell envelope and cellular processes	Sporulation	TSS not determined in this study
spoIIB	0.402293	0.112134	endospore development protein SpoIIB	cell envelope and cellular processes	Sporulation	Not Detected
spsJ	9.8685	13.0548	spore coat polysaccharide synthesis protein SpsJ	cell envelope and cellular processes	Sporulation	Not Detected
spoIIE	0.43432	0.183935	sporulation stage II protein pSpoIIE	cell envelope and cellular processes	Sporulation	Not Detected
spsE	37.6057	44.3253	spore coat polysaccharide synthesis protein SpsE	cell envelope and cellular processes	Sporulation	Not Detected
mecB	8.76667	36.9439	negative regulator of genetic competence MecB	cell envelope and cellular processes	Transformation/competence	SigK*
yvqJ	3.4066	4.17702	conserved hypothetical protein YvqJ	cell envelope and cellular processes	Transport/binding proteins and lipoproteins	SigA*
mntH	10.3475	19.7219	manganese transport protein MntH	cell envelope and cellular processes	Transport/binding proteins and lipoproteins	SigA*
dctP	23.282	11.5565	C4-dicarboxylate transport protein DctP	cell envelope and cellular processes	Transport/binding proteins and lipoproteins	SigK*
ycgO	4.38116	2.81594	sodium/proline symporter YcgO	cell envelope and cellular processes	Transport/binding proteins and lipoproteins	TSS not determined in this study
ytnA	3.64719	5.46491	putative amino acid permease YtnA	cell envelope and cellular processes	Transport/binding proteins and lipoproteins	Not Detected
ywrK	DIV/0!	311.042	putative transporter YwrK	cell envelope and cellular processes	Transport/binding proteins and lipoproteins	Not Detected
dnaG	4.07994	2.10942	DNA primase DnaG	information pathways	DNA replication	SigH
holB	3.84251	3.89315	DNA polymerase III (delta subunit) HolB	information pathways	DNA replication	TSS not determined in this study
rbfA	9.36207	14.0212	ribosome-binding factor A RbfA	information pathways	Protein synthesis	TSS not determined in this study
phoP	2.32152	2.38011	alkaline phosphatase synthesis transcriptional regulatory protein PhoP	information pathways	RNA synthesis	SigE
gerE	53.7817	795.909	germination protein GerE	information pathways	RNA synthesis	SigK
rpoD	2.89174	2.69054	RNA polymerase major sigma-43 factor (sigma-A) RpoD	information pathways	RNA synthesis	Not Detected
yhaA	2.83703	5.76812	putative aminoacylase YhaA	intermediary metabolism	Metabolism of amino acids and related molecules	SigA*
aprX	19.1621	102.383	intracellular alkaline serine proteinase AprX	intermediary metabolism	Metabolism of amino acids and related molecules	SigK*
ycgM	3.53205	2.47267	putative proline dehydrohenase YcgM	intermediary metabolism	Metabolism of amino acids and related molecules	TSS not determined in this study
csd	2.86423	5.45786	cysteine desulfurase Csd	intermediary metabolism	Metabolism of amino acids and related molecules	TSS not determined in this study
glmS	3.03172	6.0268	l-glutamine-D-fructose-6-phosphate amidotransferase GlmS	intermediary metabolism	Metabolism of amino acids and related molecules	TSS not determined in this study
asd	3.73661	31.5277	aspartate-semialdehyde dehydrogenase Asd	intermediary metabolism	Metabolism of amino acids and related molecules	Not Detected
yusX	2.38232	1.99649	putative oligoendopeptidase YusX	intermediary metabolism	Metabolism of amino acids and related molecules	Not Detected
bpr	0.347949	0.358045	bacillopeptidase F precursor Bpr	intermediary metabolism	Metabolism of amino acids and related molecules	Not Detected
ald	2.03653	2.12242	alanine dehydrogenase Ald	intermediary metabolism	Metabolism of amino acids and related molecules	Not Detected
citB	2.42651	3.31978	aconitate hydratase CitB	intermediary metabolism	Metabolism of carbohydrates and related molecules	SigA*
sdhC	2.32227	2.56128	succinate dehydrogenase (cytochrome b-558 subunit) SdhC	intermediary metabolism	Metabolism of carbohydrates and related molecules	SigA*
ygaK	DIV/0!	DIV/0!	conserved hypothetical protein YgaK	intermediary metabolism	Metabolism of carbohydrates and related molecules	SigK*
yhcV	25.9692	25.9287	conserved hypothetical protein YhcV	intermediary metabolism	Metabolism of carbohydrates and related molecules	SigG
yfnH	DIV/0!	1345.92	putative glucose-1-phosphate cytidylyltransferase YfnH	intermediary metabolism	Metabolism of carbohydrates and related molecules	SigK
odhB	2.14818	2.22357	dihydrolipoyllysine-residue succinyltransferase component of 2-oxoglutarate dehydrogenase complex OdhB	intermediary metabolism	Metabolism of carbohydrates and related molecules	TSS not determined in this study
sdhB	2.23558	2.27255	succinate dehydrogenase (iron-sulfur protein) SdhB	intermediary metabolism	Metabolism of carbohydrates and related molecules	TSS not determined in this study
acuC	2.22993	2.51706	acetoin dehydrogenase AcuC	intermediary metabolism	Metabolism of carbohydrates and related molecules	TSS not determined in this study
mdh	2.3879	2.60226	malate dehydrogenase Mdh	intermediary metabolism	Metabolism of carbohydrates and related molecules	TSS not determined in this study
sucD	5.3654	4.52151	succinyl-CoA synthetase (alpha subunit) SucD	intermediary metabolism	Metabolism of carbohydrates and related molecules	TSS not determined in this study
pckA	2.53142	2.83597	phosphoenolpyruvate carboxykinase PckA	intermediary metabolism	Metabolism of carbohydrates and related molecules	Not Detected
dxr	2.34891	3.63106	1-deoxy-D-xylulose 5-phosphate reductoisomerase Dxr	intermediary metabolism	Metabolism of carbohydrates and related molecules	Not Detected
ribTD	4.1305	4.43236	protein Involved in riboflavin biosynthesis RibTD	intermediary metabolism	Metabolism of coenzymes and prosthetic groups	Not Detected
hemX	7.29322	3.40366	membrane-bound protein HemX	intermediary metabolism	Metabolism of coenzymes and prosthetic groups	TSS not determined in this study
yabR	2.4637	2.35882	putative polyribonucleotide nucleotidyltransferase YabR	intermediary metabolism	Metabolism of nucleotides and nucleic acids	SigA*
pnpA	2.03119	1.97957	polynucleotide phosphorylase (PNPase) PnpA	intermediary metabolism	Metabolism of nucleotides and nucleic acids	SigG*
yfkN	2.30194	3.86104	putative multifunctional phosphoesterase YfkN	intermediary metabolism	Metabolism of nucleotides and nucleic acids	Not Detected
cdd	3.44918	9.92313	cytidine deaminase Cdd	intermediary metabolism	Metabolism of nucleotides and nucleic acids	Not Detected
yyxA	2.62374	2.62155	putative serine proteinase YyxA	other functions	Adaptation to atypical conditions	Not Detected
baeS	3.11917	3.27844	putative cytochrome P450 107K1 BaeS	other functions	Antibiotic production	Not Detected
ahpF	2.81189	3.70017	alkyl hydroperoxide reductase (large subunit) and NADH dehydrogenase AhpF	other functions	Detoxification	TSS not determined in this study
yvdP	49.8564	DIV/0!	conserved hypothetical protein YvdP	other functions	Detoxification	Not Detected
era	2.09309	13.0703	GTP-binding protein Era	other functions	Miscellaneous	TSS not determined in this study
yndL	DIV/0!	17.8675	conserved hypothetical protein YndL	other functions	Phage-related functions	SigK
RBAM00750	173.609	103.741	hypothetical protein RBAM00750	unknown	No similarity	SigK*
RBAM01780	60.6801	41.9172	hypothetical protein RBAM01780	unknown	No similarity	SigK*
RBAM00189	15.3829	10.9554	hypothetical protein RBAM00189	unknown	No similarity	SigK*
RBAM00369	132.41	62.4952	hypothetical protein RBAM00369	unknown	No similarity	SigK*
RBAM03863	310.426	114.028	conserved ypothetical protein RBAM03863	unknown	No similarity	TSS not determined in this study
RBAM03864	DIV/0!	146.027	conserved hypothetical protein RBAM03864	unknown	No similarity	TSS not determined in this study
RBAM03861	DIV/0!	248.063	hypothetical protein RBAM03861	unknown	No similarity	TSS not determined in this study
RBAM01295	3.38531	6.91024	conserved hypothetical protein RBAM01295	unknown	No similarity	Not Detected
RBAM02552	69.145	90.1409	hypothetical protein RBAM02552	unknown	No similarity	Not Detected
RBAM00751	DIV/0!	116.282	conserved hypothetical protein RBAM00751	unknown	No similarity	Not Detected
RBAM00521	DIV/0!	DIV/0!	hypothetical protein RBAM00521	unknown	No similarity	Not Detected
RBAM01164	278.809	777.297	hypothetical protein RBAM01164	unknown	No similarity	Not Detected
RBAM02055	68.4088	25.7153	hypothetical protein RBAM02055	unknown	No similarity	Not Detected
RBAM03860	DIV/0!	70.9987	conserved hypothetical protein RBAM03860	unknown	No similarity	Not Detected
RBAM03862	266.737	78.2113	conserved ypothetical protein RBAM03862	unknown	No similarity	Not Detected
ydaB	4.31787	12.1523	putative acid-CoA ligase YdaB	unknown	Similar to unknown proteins from B. subtilis	SigB*, SigF*, SigG*
yhjE	8.36746	2.8296	conserved hypothetical protein YhjE	unknown	Similar to unknown proteins from B. subtilis	SigF*
ymfJ	17.1267	7.99119	hypothetical protein YmfJ	unknown	Similar to unknown proteins from B. subtilis	SigF*, SigG*
yusG	9.38944	5.79379	hypothetical protein YusG	unknown	Similar to unknown proteins from B. subtilis	SigG*
yqgE	10.5711	6.10154	hypothetical protein YqgE	unknown	Similar to unknown proteins from B. subtilis	SigG*
yfhD	105.344	28.1099	hypothetical protein YfhD	unknown	Similar to unknown proteins from B. subtilis	SigG*
yycN	13.8797	7.45233	conserved hypothetical protein YycN	unknown	Similar to unknown proteins from B. subtilis	SigH*
yueG	70.1573	50.2641	hypothetical protein YueG	unknown	Similar to unknown proteins from B. subtilis	SigK*
ypuF	11.355	44.2492	conserved hypothetical protein YpuF	unknown	Similar to unknown proteins from B. subtilis	SigK*
yodI	184.915	461.481	hypothetical protein YodI	unknown	Similar to unknown proteins from B. subtilis	SigK*
ylaA1	4.43923	2.82765	hypothetical protein YlaA1	unknown	Similar to unknown proteins from B. subtilis	SigW*
ywdL	6.54136	3.5958	hypothetical protein YwdL	unknown	Similar to unknown proteins from B. subtilis	SigE
yfnE	DIV/0!	101.68	hypothetical protein YfnE	unknown	Similar to unknown proteins from B. subtilis	SigE,SigK
yhcN	12.9732	6.7447	putative lipoprotein YhcN	unknown	Similar to unknown proteins from B. subtilis	SigF,SigG
yhcQ	6.58219	4.94612	conserved hypothetical protein YhcQ	unknown	Similar to unknown proteins from B. subtilis	SigG
yrrD	6.33853	11.8185	conserved hypothetical protein YrrD	unknown	Similar to unknown proteins from B. subtilis	SigG
yuzA	3.5929	2.22884	conserved hypothetical protein YuzA	unknown	Similar to unknown proteins from B. subtilis	SigG
yjcC	59.7858	183.183	hypothetical protein YjcC	unknown	Similar to unknown proteins from B. subtilis	SigK
yngK	21.5893	43.7527	conserved hypothetical protein YngK	unknown	Similar to unknown proteins from B. subtilis	SigK
yodH	27.7851	DIV/0!	conserved hypothetical protein YodH	unknown	Similar to unknown proteins from B. subtilis	SigK
yxeE	DIV/0!	96.4066	hypothetical protein YxeE	unknown	Similar to unknown proteins from B. subtilis	SigK
yloV	3.93835	2.70858	conserved hypothetical protein YloV	unknown	Similar to unknown proteins from B. subtilis	TSS not determined in this study
ydcE	2.36914	3.0428	conserved hypothetical protein YdcE	unknown	Similar to unknown proteins from B. subtilis	TSS not determined in this study
yurU	3.93695	4.28831	conserved hypothetical protein YurU	unknown	Similar to unknown proteins from B. subtilis	TSS not determined in this study
yurX	4.42858	6.89436	conserved hypothetical protein YurX	unknown	Similar to unknown proteins from B. subtilis	TSS not determined in this study
yfnD	53.4623	95.8163	hypothetical protein YfnD	unknown	Similar to unknown proteins from B. subtilis	TSS not determined in this study
yfnF	44.9033	160.507	hypothetical protein YfnF	unknown	Similar to unknown proteins from B. subtilis	TSS not determined in this study
ylmC	6.8132	2.39053	conserved hypothetical protein YlmC	unknown	Similar to unknown proteins from B. subtilis	Not Detected
ycsK	53.2707	98.763	conserved hypothetical protein YcsK	unknown	Similar to unknown proteins from B. subtilis	Not Detected
yhdB	88.529	115.087	hypothetical protein YhdB	unknown	Similar to unknown proteins from B. subtilis	Not Detected
yqfX	49.4223	31.1598	hypothetical protein YqfX	unknown	Similar to unknown proteins from B. subtilis	Not Detected
ywrF	14.3237	44.8736	conserved hypothetical protein YwrF	unknown	Similar to unknown proteins from B. subtilis	Not Detected
ykzD	5.85814	2.32906	hypothetical protein YkzD	unknown	Similar to unknown proteins from B. subtilis	Not Detected
yqfQ	DIV/0!	61.5732	hypothetical protein YqfQ	unknown	Similar to unknown proteins from B. subtilis	Not Detected
ypjP	2.43633	2.86863	hypothetical protein YpjP	unknown	Similar to unknown proteins from B. subtilis	Not Detected
yhcP	22.771	96.0331	hypothetical protein YhcP	unknown	Similar to unknown proteins from B. subtilis	Not Detected
RBAM02520	44.6625	45.1696	hypothetical protein RBAM02520	unknown	Similar to unknown proteins from other organisms	SigF*
RBAM02071	93.9024	46.0774	hypothetical protein RBAM02071	unknown	Similar to unknown proteins from other organisms	SigG*
RBAM02863	86.1018	12.5206	hypothetical protein RBAM02863	unknown	Similar to unknown proteins from other organisms	SigG*
RBAM01088	117.957	53.6151	hypothetical protein RBAM01088	unknown	Similar to unknown proteins from other organisms	SigG*
RBAM03836	55.2891	29.2419	conserved hypothetical protein RBAM03836	unknown	Similar to unknown proteins from other organisms	SigK*
RBAM03891	DIV/0!	DIV/0!	hypothetical protein RBAM03891	unknown	Similar to unknown proteins from other organisms	SigK*
RBAM01087	50.6519	30.9934	hypothetical protein RBAM0RBAM01087	unknown	Similar to unknown proteins from other organisms	TSS not determined in this study
