# Supplementary material for: dRNA-Seq Reveals Genomewide TSSs and Noncoding RNAs of Plant Beneficial Rhizobacterium Bacillus amyloliquefaciens FZB42
Source: PLoS One. 2015 Nov 5;10(11):e0142002. doi: 10.1371/journal.pone.0142002 (PMC4634765; doi:10.1371/journal.pone.0142002)
Supplement: S8 Table — (XLSX) [file pone.0142002.s019.xlsx]

## Sheet: S8
S8 Table: Cis-encoded regulatory RNAs identified
Name	Left gene	Right gene	Orientation	Annotatioin	Sequence (5'-->3')	Length
bar001	rplA	rplJ	>>>	L10_leader	GTTGTAAAATATAATATGTCATTTATACCGTAGACAGCAGGGGCCGTTAAGGCTTAATATCCTGCCGAGGTGTATATATATCACAGCTATTACGTTACGTATGCTTGTATATACAGCCTCCATGTCCACATGGAGGCTTTTT	142
bar002	truA	rplM	>>>	L13_leader	GGTATGTATTTCAACCCCACGATAAGCCCCGGAACTTATTGTGTTGTGAAATAGAACGTAATCGAAGATTATTGAAAATGACAGATCATTTAGGAGGGAAATTCAAT	107
bar003	trmD	rplS	>>>	L19_leader	GTGGCTTAAGGAGGCTTATCCTTCAGAAGCTTGAAAACGATGTTCCGCTGTGCCTTGCAGTTGTGGCCAAGAGCATCTGTTGGAAGGAGTTGAAAA	96
bar004	infC	ysbB	<<<	L20_leader	aaagttgatccggagaagtcattcttgactaatgatccggtattgtgtagaatagttattgaattgaatataaatcacaagcagaggcacccgcttctcacctgattgacacattcatgtagttggcaggttgaccgtacatttttatttatgcagatgttcgtagtgtgggtgtgttgtcatgcccgcactttttgttt	200
bar005	rplU	spoIVFB	<<<	L21_leader	gttatggatgtagcaccaatgctacaaccgctcgggacaggtgataagagctttaaagccccctgttgctggcgagtcttagtctaataggaggtg	96
bar006	trpE	aroH	<<<	Trp leade_2	agcttagaaatacacaagagtgtgtatagagctggtaagtaagatattgaacagttgagtttagaatagggtagcagagaatgagtttagctgagctgagataaacacgtttttattctgcccaaaagaagcctttcttttgggtttatttctt	154
bar007	ykzD	ykoK	>>>	ykoK leader	GTCAATTCAAATAAGAACTTCGTTAGGTGAGGCTCCTGTATGGAGATACGCTGCTGCCCAAAAATGTCCAAAGACGCCAATGGGTCAACAGGAATCATCGACATAAGGTGATTCTTAACGCAGCTGGATGGCTGTCCTATGCCATACAGTGCTAAAGCTCTACGATTGGAGGCCCCGCACGTTTATTTGCCGTGCTTGTTTTCGCCTTCATATCAGAAGGTTTTTTTTAT	230
bar008	yxkD	yxkC	<<>	ykkC-yxkD leader	agatatacaaaaactgaacataaaaaacagtggttttctagggttccgcaatgctgaattggtctggaccgagagaaaacacacagcaggttcctgctgtgacacgttgggataaaagcccgggagtttctgctcttttaatgaagagtgctctcccgggcttttttg	168
bar009	ykkB	ykkC	>>>	ykkC-yxkD leader	AGACATGTTTTCTAGGGTTCCGCATGTTCATACATGGCCTGGTCCGAGAGAAAACACATATGCGGACATATCCCGCATATGCACACGGAGGGAAAAAAGCCCGGGAGAGTCAATCTCATGTGAGACGACTATCCGGGCTTTTTTGT	146
bar010	ykoX	ykoY	>>>	yybP-ykoY leader	ATAAACAAATATTTCTTGAAATCCCAAAGGGGAGTAGCGTCCGGATATTCCGGAAACAAAGTCGTCAATTCATGGATCATATCCATCGGCTTTGTTGGCATGCCAATCATTCATGTCTAGCAAGACCTTTGCCTTATATCGGCAAAGGTCTTTTTT	156
bar011	ydaN	ydaO	>>>	ydaO/yuaA leader	ATAATCTATATCGCTTAATCTGTAATCAGAGCGGGGGAACCAATTTGCGGCGGATGCCGCTTGGGGTGAATCCTTTTTCAGGTAGGGCCAACTCTCATCAGCCCGAATCCGACAGCTAACCTCGTAAGCGTTCATGAGAGGAGATGAATGAAACCTGTGCACGATTATGGCGCAGGGGCATCCGTTTGCCTCTGTGTCTTTTT	203
bar012	panB	birA	<<<	pan RNA motif	gggcagtatcataatgaactgcacccgatcagcagaacagagattacgaaaagtctgccttgatccaaaaaaggactgggacagagggatgacattcgccgaacgttaaacaagtgggaatccttcttattttacagaaggctttttt	148
bar013	ylyB	pyrR	>>>	PyrR	AAGCTGAATAGATTCTTTAACACAGTCCAGAGAGGCTGAGAAGGATAACGGATAGGACAGAAGAGATACGCATGTGTCTTCGTCCTGGAAAGGAACCCCTCTATGCTCTGGCAGGAGGGGTTTTTTCTT	129
bar014	divIVA	ileS	>>>	TPP(or PyrR)	ATAAATTCAGATGAAAAGACGATTGAAAGGGACCGGCATGACTCAAAACAGGCTATAAAGCGACCCGGGGAAGGTGAAAGCCCGGGATGGCCGGAATCATGCAGATCAGCCCTTTAGTTTCCTTTCTGAACCGAGAGTAGGAAAGGACGTTCCATCACGTTACGATGTTCGAGAGGAAAAGACGGATGATCCGTTTTTTCTAAAAGGGTGGTACCGCGAGATAAGCTTTCTCGTCCCTTATGGGATGAGAGGGCTTTTTTTTATTT	266
bar015	ydeH	RBAM_005680	>>>	TPP(or PyrR)	AAATATTTATAAAAAGTCACTAGGGGAGCTTTAATAGCTGAGAAGAGACAATACGTCCTGACCCTTTGAACCTGATTTGGTTAATACCAGCGTAGGGAAGTGAAAAATTAGAGAGATTCTTTATCTTATCTATATTTAAGCCACTTTCCATAGAGGAAAGTGGCTTTATTTATTTTGAAAGGGTGATATGAAGTGGCGACTAAAAAAGTTTTTCTGGCAGGGCCTTTT	228
bar016	yjbQ	tenA	>>>	TPP	ATAACAAATAAATCAATAATCGTATGACCACTAGGGGTGTCCTTCATAAGGGCTGAGATAAAAGTGAGACTTTTAGACCCTCATAACTTGAACAGGTTCAGACCTGCGTAGGGAAGTGGAGCGGTATTTTTTT	133
bar017	ygaJ	thiC	>>>	TPP	GAAATCAATAGTTACTGGGGGTGCCCGTCTGAGCGGGCTGAGAGAGAAGCGGCGGCTTCTTAACCCTTTGGACCTGATCTGGTTCGTACCAGCGTGGGGAAGTAAAGGTTTTATTATTGTTGATGAAAACAATAATAGTTTCTTTCTGACTGCAAAACCGGGTTCTTCTTTGAACCCGGTTTTTTT	186
bar018	16S	yuaJ	<>>	TPP	GAACTAAATACTTGATGACCACAAGGGGAGCATTAAAGCTGAGAGTGAACGTTTTGTTCTGACCCTTTGAACCTGTTAGTTAACGCTGGCGTAGGGATGTGGCAAAGCCAAATGATTTGCAGTTTATGCAAGCAGCGCGCGGACCTTTTCCCATCCTTCCCCGCGCTGCTTTTTTGTTt	179
bar019	ykoE	ydhD	<<>	TPP	atcataaaaaactgtataggaaacgcactaggggtgctgttatcggctgagataaaacatgcggcaggcgtgttttgatcccttataacccgatctggataataccagcgtggggaagtgcagattgaccggagcgcagggtttttccccatgcgttttcgttctgctgctgcatattccctcggatatgcagtttttt	199
bar020	yvbW	RBAM_031380	<<>	T-box	actatattcagaaaataaaaactcaagagattcatttaacataaaacactgtgaacgggagcagtaaaagaatccagtcagaaaaagagagccgcgggttggtgcaacgcggactgattgttctttgaactcgcccggaagtggcagggcggaacggaattgtcgaaatattccctatgtcctaacggctgaccttcgttaaaaggtttttaagctggattccggacattcgggatcaacaagagtggtaccgcggctgcctgaggcacgccgtctcttttcccaaagaggcggcgtgcttttttat	307
bar021	RBAM_002830	rtpA	>>>	T-box	AAAATAAAAGAACGGATGAACAATGCTGAGGAAGAGTAAGTACGCATCAGCGCGCGGGGTTCAGAGAGTCGGTGGCCGCTGTGAACCGATCCCCG	95
bar022	gltX	cysE	>>>	T-box	AATGACCATTACAGAAAGAATCTTCATCGGCTGAGAGAGATTCATGCGTCATGTTTTAGAAGTGCGCCCTTAAGACCTTTGAAGAACATTTCTGCGGAAATCAGTATTTAAAGGCGGCCGCCGCCGTTACCGGCTTTTAAGTTGGGAAAACAGTGACTTGTTTTTCAAACAGAGTGGAACCGCGCGGTAAAAGCGTCTCTGTCATGTTTACATGCAGAGGCGCTTTTTTT	230
bar023	ilvB	RBAM_025380	<<<	T-box	aaacaaaaataaataaatgattcacgctaaaaagaaaaatcataaaacactgaaaaaacaaacaaatgaaggttcttttttaataaaagagctgccataataaaaagcgcagaagaggataagtagctttgctgaagtttttcacagagagccggtaacgctgagagccggtaaaacaaatcaaagtgaactcccctcagagtgccggtctgaaatgtaaagagtaggactcggccgagtgaacgcaatgtttactcgttat	262
bar024	alaS	yrrI	<<<	T-box	agaatacatacgaatctcgagtgacggatatgagtacgccgaagccctgtttaagagagaagctccgatacgctgaaaggagcttcagcagaagatcggccgaagctaatcctgagtgcagttaaaggctgccgcagtcctgcgttacgggatgaaaggtgacaggcctttttcggcctgtaatcagggtggtaccgcgagacagctctcgtccctgtgtgaacgcatggtttgcatagggagagagctttttt	254
bar025	thrS	ytxC	<<<	T-box	ataaaagattaatgattgctacacgtattgataaggacatgaagcattgataccggctttataagagaggagagcccaggctgaaagctttccagctatggatcattgtctttaccgcctttgaacttcagctgtgaacgccggaagaagcgccagtaatagctgacgggaactcccgttacagagtttagagccgcaggtgccgaaacaatcggccgcgcggaaaaaagggtggaaccacgattccgtttatttaacctcgtccctttcatagggggcggggtttttg	289
bar026	purU	proB	>>>	T-box	AAAAAAATCATTGAGCGTTGAAGAGGATCAGTACGCAGAACTTTCTGTGACAGAGAGCAAAATGGCCCGCTGAAACATTTTGCCGCATGAAACCTGCCGAACCTGCCTTGGAGTCCTGAGGGGAAAACTCAGGCGCGATAACCTGGCGTTACAGGAAAGCGGGACGCGTGAAAAACGCGTTCAAACAAGGTGGTACCACGGAAAGCCCATTTCGTCCTTATTTTTCAGGACGGAATGGGCTTTTTTT	247
bar027	valS	RBAM_025150	<<>	T-box	ataataaataagatcatgagctgatataaatacacctgctttgaacgggaagagtacaagaaagacgcatgaagagagagaagctactgtgctgaaaggcttcttatgccgtctcattggaaggtcgcccgggagcataatttcttgaacatacagtagagaaattcgggccgcacccgttatccgtttaagtgcatgaacaaatctgttcatgaaaaaaggtggtaccgcgaaagagcttttcgtcctttatcaggatgaaggctcttttttag	275
bar028	trpS	oppA	<<>	T-box	ataatagatcaatcaaatacatttgttgtgattgcgatgatgaagagtagtacacattttcacccgtttgaagagagtctgcggtgctgggagcaggtaacgggcgatgtggaatggacttctgagcagctgaccgaacgttagtaggcccagccggagcagcctccgttaccaacgtctcgagcgattccattgtaatggaataatcagggtggcaccacggttcattcgtcccttttttctacgggaagaatgggcttttttt	265
bar029	leuS	ytvB	<<>	T-box	aagattacggtagcgataagaacagtgaagaggagcagtaagaagcagattttgcaatcagagagttgacggccggtgcaagtcaatcaagtctgtttccgaactcgcctcagagttgcagcggcaaaaccgctgacgcataactgcgttaaaagtatcaagtgagtgcggctcaaaaccgcgctaacgagggtggtaccgcgggaaataaaaatctctcgtccctttttgggatgagggagttttttt	249
bar030	pdxT	serS	>>>	T-box	ACAAATAAAGATCGAAAAGCGTTGACAGGAAGCAGTAGGGGGCCCCTCTTTCAAAGAGAGCCGATGGGTGGTGCGAATCGGTGAAAGATGCTGTCCGAATCCGTCCTTGAGCGAAATGCTGAAACCAAGTAGGCATTTACGGGAAAACCGTTATGTGTTAAAGCGGGAAGCAAGTGTGAGCTTGTTTTCAATCAGGGTGGCAACGCGAGAGCTCTCGTCCCTTTTAGGGGATGAGGGCTCTTTTTT	246
bar031	glyQ	recO	<<<	T-box	attataaaatatgttgcagtgacagaaagaagtacttgcgtccaactcatacaagcgaccttagggcagtgtaagctaaggatgagcgcgcaacgaaaggcattctcgagcaaccctttaaaaagaggctgagtgattcacatcctcagcaactagggtggaaccgcgggagaactctcgtccctatgtttgcggccggcaagcatagagacgggagttttttggt	226
bar032	hisS	yrzK	<<<	T-box	agaaattgatgtacataagtcatgataacgattttgaaccgataatggagaagagtaggtcagaatgcatggagaagagaggaaccgtcccgggctgaaagcggatccgcactgcatctttctcgaaacaacactccggaggttccctgctgaacgcttttgcaagtcattaggcagcggacgtgaacctgcgttaaaggtcagagcggggatgcttcggcattccaactagggtggcaccacgggtataactctcgtccctactatacatgtatagtaggagcgggagtttttttat	298
bar033	RBAM_024030	spoIIIC	<<>	T-box	aaaaaaagtaagggtaaaacaatataaccgaaaagcgctgaagagacgagtagacagatatcattcatgacagagagctccgggagctgtgaaggagtatgaatggatgtgttgaaacaaacctcttagcttcgcatcggaatcatgcaacacgacgatgatgcggcggatactcctgttaccgagtaagctttgtacccggcaaggccggcaccaaaccgaattgaggtggcatagcgggctgtttcccgtcctcaagactttattgtcttgagggcgtttttt	285
bar034	pheS	ysgA	<<<	T-box	agcaataatgtaaaaaccgtgacagaggacgtcaatttttgcacacactgccttccagggagaaaatgccgctgactgaaagcatttttatcgcagcacaaaaattgattttcacctctcgagttgtcaccgggaccgcgccaaacgcgcgtaaaggtgaaccggaacgatcgtttccgttatgtcaatgaagctgtcggcagatgaagtctgccttaaaaagggtggtaccgcggccacaactcgtcccttctctcaaggggcgggtttttttgt	276
bar035	tyrS	acsA	<<<	T-box	aagcttcatacgaaaaggttttgattgagacaagtagggtatctgattgttcaagagagctgatggccggtgaaaatcagcacataagatatgccgaatacactcatgaaccgcttttgcgaacaaagcccttccaaggctttcagtagtgaaagaacggacacggtccgttatcaaaaagagtgataaaagcttttttatgcttttattagtagggtggtaccgcgattatatcgtcccttcgttttaaacgaaggggcgtttttt	267
bar036	yqjP	proI	<>>	T-box	AACAACAAACTAGAAAACACGGAACGCGATGACGAGGAACTAGTATATAAACAACGGCAGCAGAGAGCAATGTCCCCGGCTGAAAGACATTGCGGCCCTCTTGTTTACAGAACCTGCCCTCAGAGCGGTTAGGAAAACCTAAACGTATCCCCTCGTTACGGGATTTGAGCTGAGCACGGCTGATTCGTGCTAATGTAAGGTGGTACCGCGAAACCTTTTCGTCCTTTTTGACGGGAAGGTTTTTTTGT	248
bar037	yitJ	yitK	<<<	SAM	agaaagggattttcacagttaagttttggaaacccatgacaattacatgaacgttcttatcaagagaagccgagggactggcccgacgacgcttcagcaaccggtgtagtggtttacccaaaccatgaccaaggtgctaaatccagcaagctaaaaacagcttggaagataagaagagagacaaatgattacaaagtcttcttcttaagaagacttttttt	221
bar038	mtnE	mtnW	>>>	SAM	ACTTTATAAAATCATTATTCTTATCAAGAGCAGGCAGAGGGACGAGCCCGATGAAGCCCGGCAACCGACTGATAAAGCACGGTGCTAATTCTTGCAGCAGGAGCTGAGAGATAAGATTCGGACATAACACGAAGCCTCTTTCTGCTCATACGGAAGAGGTTTTTTT	166
bar039	pyrE	cysH	>>>	SAM	AAATCTAAAAAGCTTATCAAGAGCGGCTGAGGGACTGGACCGATGACGCCCGGCAACCTGCGTGTATTGCAAGGTGCCGCATCCAGAAAAATGC	94
bar040	metE	ispA	><>	SAM	acaaatgatgtaacttttcaaaaaaattgaaatattttctcttatcgagagttgggcgagggattggccttttgaccccaacagcaaccgaccgtaattccattgtgaaatggggcgcgtgatttttgcgccgagacgactgtctcataaggcacggtgctaattccatcagacgtgatctgagagataagagaggcttacattttgaagttaaagcctctttctctcatgagaaagaggcttttttgt	249
bar041	mtnK	ykrU	<<<	SAM	aactgattaatccgaattgtgatacaaatcaatatatttttctcttatcgagagttgggcgagggattggccttttgaccccaacagcaaccgaccgtaattccattgtgaaatggggcgcgtacattttgcgccgagacgattgtctcataaggcacggtgctaattccatcagatgttatctgagagataagaggcggactgcactgtttcagcctccttctctttcagagaaggaggcttttttt	248
bar042	ycjH	ycjI	<>>	SAM	ATCAGAAAATACAAAACAATATTCTTATCACGAGAGGTGGAGGGACTGGCCCTTTGAAACCTCAGCAACCGGTTTGCTTTGCCGCGGGAAGGCAAAGTGCCAAGGTGCTAAATCCAGCAAGCGATTCACATGCTTGGAAGATAAGAGGAAGAGAAAAGCTCCTTCTTCTTATGAAGAGGGGGCTTTTTTAT	191
bar043	yoaD	yoaE	<<>	SAM	attcttttaaacagcctgacaatttcatcattttattttctatccagagaggtggagggactggccctacgaaacctcggcaacatttattgtgcc	96
bar044	yusC	yusD	<<<	SAM	aagaatttccggacgaaaatacgatatgttttctcttatcaagagaggtggagggaagtgccctatgaagcccggcaaccatcaacaatgttgaaatggtgccaattcactcgaagcggtctgctttgaaagatgagagaaaggcctttttcaataagcctttctgctcatttttgcagaaaggcttttctttt	194
bar045	xpt	ypwA	<<<	Purine riboswitch	aatatcatacgaacactcatataatcgcgtggatatggcacgcaagtttctaccggtcaccgtaaatgtccgactatgagtgagcaatggaacggctttattcggccgttacgtgtagatcattcggcattgcttgctctttttttggagagcgggcgatgcttttttt	169
bar046	yebG	purE	>>>	Purine riboswitch	GAAATCAAAACACGACCTCATATAATCTTGGGAATATGGCCCATAAGTTTCTACCCGGCTGCCGTAAACGGCCGGACTATGCAGGAAAGTGATAAACAGCTGACATGGATATCGCAGAAGCGAACGACTGACGATACGCGCGCCATGCCCGGTTTGTATTGCTTCCTCATAGTTGCAATATAAGCCGGGCTTTTTTTT	198
bar047	RBAM_013480	ykvJ	>>>	PreQ1 riboswitch	AGTGAAAAAAGAAGAAAATCCGTATTGATGCGGGAGAGGTTCTAGCTACACCCTCTATAAAAAACTAAGGACGAGCTGTATCCTTGGATACGGTTTTTTT	100
bar048	ydhL	ydhQ	<<>	Purine riboswitch	agaaacggacacaaccgaatattgcatacattgtataacctcaatgatatggtttgagggtgtctaccaggaaccgtaaaatcctgattacaaaaattgtcccgtacactttttgtaatcaggatttttt	130
bar049	RBAM_006780	pbuG	>>>	Purine riboswitch	AGAAATCAAATATGCAGATATCGTATAATGGCGGGGATATGGCCCGCAAGTTTCTACCAAGCTACCGTAAATGGCTTGACTACGGATCAATCTCAATCGTTTGATATAAATAATCCATTCTTATTTATTCAGACTGAACGTATGTAGTCAAGCGTCCCAAATGTATTTGGGGCGTTTTTTAT	182
bar050	yvsH	sspJ	<<<	Lysine riboswitch	agaattgaatgataaaaatcctcactctttctcggtgaggtagaggttgcgcttgatgatgagtcgcacatgccaggctgataggggccgcaaaacatgtgttaaaggcatcagcgccgaagtgtaaagaaagccgatccttctttatgctgggactgtatctgaataagtgcaggactgccgcgtgctttttcgcggagggctatccggagatcaagggtgtgtgtgtttctttaagcatggacttttgttcaggcttttttt	264
bar051	gcvT	yqhH	<<>	Glycine riboswitch	aatgatttcactaaaagatattgctttagtatgtccataaaattggtaaatatgagcgaatgacagcaaggggagagactcggacgaaagatgggcgtccgggcgccgaaggagcaaactgcggagtgaatctctcaggcaaaagaactcttgctcgacgcaactctggagagtgtctgcacttagaagcagcagaccaccaaaggggacgtctttatgatatgttcataaagtaaactttcaggtgccgggacagagaaaccttcattttcatgaggtgtttctctgtcctttttt	297
bar052	yxjB	yxjA	<>>	Purine riboswitch	ATCTCATGTAATATCGTTATTCTTGTATATGATCAGTAATATGGTCTGATTGTTTCTACCTAGTGCCGTAAAAGACTAGACTACAAGAAAGTTTGCATAAATTTGAACGAGTGAAAAGCATATGATGCTGTCAGTCTATTCTTTTCTTTTGGCTCTTATTTATCACACTTTCTGGCTTTCAGGAATTTGTGACGAATAAGAGTTTTTTTT	210
bar053	ydgF	fbp	<<>	Glycine riboswitch	tagctgataggtatttctatcagaaactcaatacgtagcaggctatgattgctgtgggtcgaactacagcaggagcggcttctggagagaccgcgggttttccgcggcgccgaagggttcacaatctcaggcaaaaggacagaagagtaccgaatatgtatttgtcatgctgttgattgtcagcggcgcagatataatttgatattcttatgaccatgagattggagggcatccaatctcttttttt	247
bar054	ribD	ypuD	<<<	FMN riboswitch	agcggataaggacaaaaaaatattgattgtatccttcggggctgggtgaaaatcccgaccggcggtaataaggcgttttgcgctttacagcccgtgacccgtatgcatctgtatacggtggattcagtgaaaagctgaagccgacagtgaaagtctggatgggagaaggatgagagaagctatgcaaaaaataaacttactgtatagtcttatttcct	218
bar055	lysC	uvrC	<<<	Lysine riboswitch	aatttcataagatcgtgttatatggtgaagatagaggtgcgaacttcaatagtaagcctttggagaatgatggattctgcgaaaaaggctgaaaggggagcgtcgccgaagtgtatcacatcccatcggtgtgattcgctggccttgcattaaataaatgtaaggctgtcaagaattcattttcttggagggctatctcgttgttcataatcaatcgtaatgatatgaaaaagcaatgagagctattcctctcattgcttttttt	265
bar056	glmM	glmS	>>>	glmS riboswitch	gttcagcctttgtttttcacttgcaggaaaggcgggattgtttgcatcttttataattacagcgcccgaactaagcgcccgaaaaacggcttagttgacgaggatggaggttatcgaattttcggcggatgcctcccggctgattcatttagatcacagccgtaaggatttcttcaaaccggaggggcgactctccgaacaaagagaaatcacatgatcttccaaaaaaacatgtgggaggggacgattgaaagtccccttgtaatttgactttcttcgtctcctttt	288
bar057	yjdF	ytwI	<<<	yjdF RNA	gagaatgaaaaaacacaattcggttggtagtccggatgcatgatttaaaatgtcagtaaccttcccctcctcgggatgtccatcattcttcagtaaatt	99
