# Supplementary material for: dRNA-Seq Reveals Genomewide TSSs and Noncoding RNAs of Plant Beneficial Rhizobacterium Bacillus amyloliquefaciens FZB42
Source: PLoS One. 2015 Nov 5;10(11):e0142002. doi: 10.1371/journal.pone.0142002 (PMC4634765; doi:10.1371/journal.pone.0142002)
Supplement: S17 Table — (XLSX) [file pone.0142002.s028.xlsx]

## Sheet: S17
S17 Table: A set of genes involved in plant-bacteria interation.
	Fch: fold change
Locus_tag	Gene	Start	End	Fch_RS8/SE8	Fch in microarray result	Product	Function description	Remark	Reference
RBAM_006440	tatCy	154591	155028	2.65382	1.57448	sec-independent protein translocase protein TatCy	cell envelope and cellular processes; Protein secretion	induced by root exudates	1
RBAM_001610	secY	3677172	3678500	3.13453	2.00556	preprotein translocase subunit SecY	cell envelope and cellular processes; Protein secretion	induced by root exudates	1
RBAM_025110	spoIIB	145261	146556	0.21043	-1.69657	endospore development protein SpoIIB	cell envelope and cellular processes; Sporulation	repressed by root exudates	1
RBAM_021070	ypeB	2373078	2374172	3.24722	1.54043	sporulation protein YpeB	cell envelope and cellular processes; Sporulation	induced by root exudates	1
RBAM_033230	cotG	774486	775280	5.8233	1.71581	spore coat protein G (CotG)	cell envelope and cellular processes; Sporulation	induced by root exudates	1
RBAM_035770	licA	2479549	2480454	3.49743	1.52389	phosphotransferase system (PTS) lichenan specific enzyme IIA component LicA	cell envelope and cellular processes; Transport/binding proteins and lipoproteins	induced by root exudates	1
RBAM_015410	cysP	3635498	3635812	3.65651	1.80036	sulfate permease CysP	cell envelope and cellular processes; Transport/binding proteins and lipoproteins	induced by root exudates	1
RBAM_016470	infB	149103	149498	2.77356	1.62021	initiation factor (IF-2) InfB	information pathways; Protein synthesis; Initiation	induced by root exudates	1
RBAM_025930	infC	2729683	2730705	3.13058	1.79193	initiation factor IF-3 InfC	information pathways; Protein synthesis; Initiation	induced by root exudates	1
RBAM_001740	rplM	1648983	1651133	2.48829	1.77922	ribosomal protein L13 RplM	information pathways; Protein synthesis; Ribosomal proteins	induced by root exudates	1
RBAM_001670	rpsK	2620014	2620322	2.91959	1.56469	ribosomal protein S11 (BS11) RpsK	information pathways; Protein synthesis; Ribosomal proteins	induced by root exudates	1
RBAM_001420	rplD	2487993	2489309	3.6735	1.78327	ribosomal protein L4 RplD	information pathways; Protein synthesis; Ribosomal proteins	induced by root exudates	1
RBAM_025010	rplU	980982	981332	5.01559	2.01835	50S ribosomal protein L21 (BL20) RplU	information pathways; Protein synthesis; Ribosomal proteins	induced by root exudates	1
RBAM_001680	rpoA	2203160	2204509	2.07783	2.01631	RNA polymerase (alpha subunit) RpoA	information pathways; RNA synthesis; Elongation	induced by root exudates	1
RBAM_026060	gapB	1545759	1546823	2.46848	1.56583	glyceraldehyde-3-phosphate dehydrogenase GapB	intermediary metabolism; Metabolism of carbohydrates and related molecules; Main glycolytic pathways	induced by root exudates	1
RBAM_035760	licH	2403719	2404126	4.3468	1.56215	6-phospho-beta-glucosidase LicH	intermediary metabolism; Metabolism of carbohydrates and related molecules; Specific pathways	induced by root exudates	1
RBAM_022370	ptb	2627749	2628750	2.01872	1.71702	putative phosphate butyryltransferase Ptb	intermediary metabolism; Metabolism of lipids	induced by root exudates	1
RBAM_022360	bcd	3447336	3447866	2.14384	1.84327	leucine dehydrogenase Bcd	intermediary metabolism; Metabolism of lipids	induced by root exudates	1
RBAM_022310	bkdB	149675	150619	2.98595	1.93932	branched-chain alpha-keto acid dehydrogenase E2 subunit (lipoamide acyltransferase) BkdB	intermediary metabolism; Metabolism of lipids	induced by root exudates	1
RBAM_023590	era	493010	493291	4.05749	2.1998	GTP-binding protein Era	other functions; Miscellaneous	induced by root exudates	1
RBAM_035310	ywcI	617533	618282	0.201919	-3.95626	hypothetical protein YwcI	unknown; Similar to unknown proteins from B. subtilis	repressed by root exudates	1
RBAM_023690	yqeZ	3678497	3678829	2.32027	2.01579	conserved hypothetical protein YqeZ	unknown; Similar to unknown proteins from B. subtilis	induced by root exudates	1
RBAM_004990	ydcD	2716281	2716784	2.62494	2.19576	hypothetical protein YdcD	unknown; Similar to unknown proteins from B. subtilis	induced by root exudates	1
RBAM_022660	yqhY	137101	137724	2.79355	1.49655	conserved hypothetical protein YqhY	unknown; Similar to unknown proteins from B. subtilis	induced by root exudates	1
RBAM_023700	yqeY	2374186	2375079	3.22504	2.50354	conserved hypothetical protein YqeY	unknown; Similar to unknown proteins from B. subtilis	induced by root exudates	1
RBAM_010030	yheA	2367239	2368501	3.43731	1.66045	conserved hypothetical protein YheA	unknown; Similar to unknown proteins from B. subtilis	induced by root exudates	1
RBAM_007820	yflN	2489432	2489878	4.74127	1.72864	hypothetical protein YflN	unknown; Similar to unknown proteins from B. subtilis	induced by root exudates	1
RBAM_033790	xynA	1872057	1870519	2.58071	--	xylanase	Extracellular degradation of plant cell walls	Breakdown, transport and utilization of plant derived substrates: Celluloses and hemicelluloses	2
RBAM_018150	xynD	3492633	3493274	--	--	xylanase	Extracellular degradation of plant cell walls	Breakdown, transport and utilization of plant derived substrates: Celluloses and hemicelluloses	2
RBAM_018100	bglC	1866112	1864613	--	--	endo-1,4-beta-glucanase		Breakdown, transport and utilization of plant derived substrates: Celluloses and hemicelluloses	2
RBAM_025880	ysdC	2715972	2714887	--	--	Putative endo-1,4-beta-glucanase	COG1363, FrvX, Cellulase M and related proteins	Breakdown, transport and utilization of plant derived substrates: Celluloses and hemicelluloses	2
RBAM_036190	bglS	3724830	3724099	--	--	endo-beta-1,3-1,4 glucanase	pfam00722, Glyco_hydro_16, Glycosyl hydrolases family	Breakdown, transport and utilization of plant derived substrates: Celluloses and hemicelluloses	2
RBAM_029740	csn	3091485	3092319	--	--	chitosanase	Downregulated by exudate	Breakdown, transport and utilization of plant derived substrates: Chitin, chitosan	2
RBAM_015130	bpr	1515288	1519581	--	--	Bacillopeptidase F	Upregulated by exudate	Breakdown, transport and utilization of plant derived substrates: Proteins and peptides	2
RBAM_018540	ggt	1977020	1978793	--	--	glutamyltranspeptidase	Upregulated by exudate	Breakdown, transport and utilization of plant derived substrates: Proteins and peptides	2
RBAM_029720	RBAM_029720	3090827	3090108	--	--	COG2226, UbiE, Methylase involved in ubiquinone/menaquinone biosynthesis	possible methyltransferase menaquinone biosynthesis	Breakdown, transport and utilization of plant derived substrates: Opines	2
RBAM_029710	yurR	3090070	3088955	--	--	COG0665, DadA, Glycine/D-amino acid oxidases (deaminating)	22% 48/209 AgaE (A. tumefaciens)	Breakdown, transport and utilization of plant derived substrates: Opines	2
RBAM_019060	dhaS	2023838	2025323	--	--	Putative indole-3-acet-aldehyde dehydrogenase	Involved in Trp-dependent IAA synthesis in FZB 42. Knock out mutants in the	Production of phytohormones and other compounds involved in phytostimulation and ISR	2
RBAM_026420	tpx	2771642	2772145	--	--	Thiol peroxydase	Upregulation by exudate17	Response to environmental stress	2
RBAM_007770	RBAM_007770	769334	770713	12.0799	--	Collagen like triple helix with GXT repeats	Proposed to be involved in surface adhesion	Root colonization, swarming motility and biofilm formation	3
RBAM_007760	RBAM_007760	767904	769154	6.78633	--	Collagen like triple helix with GXT repeats	Proposed to be involved in surface adhesion	Root colonization, swarming motility and biofilm formation	3
RBAM_007750	RBAM_007750	765780	767777	3.67098	--	Collagen like triple helix with GXT repeats	Proposed to be involved in surface adhesion	Root colonization, swarming motility and biofilm formation	3
RBAM_003750	yczE	375792	375145	--	--	Integral membrane spanning protein affecting lipopeptide and polyketide synthesis	Biosurfactant necessary for surface motility and biofilm formation but suppressing biofilm formation in competing microorganisms	Root colonization, swarming motility and biofilm formation	4,5
RBAM_022550	spo0A	2393886	2393086	--	--	Master regulator of initiation of sporulation	Involved in initial stage of biofilm formation	Root colonization, swarming motility and biofilm formation	6
RBAM_001230	sigH	117336	117992	--	--	Sigma factor H	Involved in initial stage of biofilm formation	Root colonization, swarming motility and biofilm formation	6
RBAM_002260	sigW	199909	200472	--	2.41407	ECF sigma factor W	Transcription control of biofilm formation	Root colonization, swarming motility and biofilm formation	7,8,9
RBAM_021250	resE	2222973	2221192	--	--	Sensor histidine kinase controlling aerobic and anaerobic repiration	Transcription control of biofilm formation	Root colonization, swarming motility and biofilm formation	7,8,9
RBAM_031670	epsA-O	3285390	3274560	--	--	Operon for capsular poly-saccharide biosynthesis	Exopolysaccharide necessary for biofilm formation controlled by sinR10	Root colonization, swarming motility and biofilm formation	9
RBAM_009570	yhxB	936650	938392	--	--	Putative phosphohexomutase	Likely involved in exopolysaccharide synthesis11	Root colonization, swarming motility and biofilm formation	10
RBAM_016860	ymcA	1694164	1694595	--	2.49226	Hypothetical protein	Control of community development8	Root colonization, swarming motility and biofilm formation	7
RBAM_032760	tuaA-tagO	3392102	3382000	--	--	Operon involved in teichuronic acid/lipopoly-saccharide	Involved in elicitation of plant basal defence12	Bacterial target molecules for general plant immune response	11
RBAM_030060	yusV	3120088	3119264	--	--	Putative iron(III) ABC transport ATPase component	deficient in biofilm formation	Biofertilization: Mineral availability (Iron, phosphate)	2
RBAM_005400	cspC	522629	522832	--	--	Cold shock protein	Adaptation to atypical conditions, involved in elicitation of plant basal defence12	Response to environmental stress	11
RBAM_009370	cspB	915954	915754	--	--	Major cold shock protein	Adaptation to atypical conditions, involved in elicitation of plant basal defence12	Response to environmental stress	11
RBAM_020070	cspD	2114744	2114944	--	--	Cold shock protein	Adaptation to atypical conditions, involved in elicitation of plant basal defence12	Response to environmental stress	11
RBAM_023340	sodA	2457322	2457927	--	--	Superoxide dismutase	repression by exudate17	Response to environmental stress	2
RBAM_037190	yycO	3826461	3825712	--	--	Hypothetical protein	Expressed in presence of soil extract17	Other genes affected by plant exudate	2
RBAM_007920	yflE	782563	784500	--	--	Hypothetical protein	repression by exudate17	Other genes affected by plant exudate	2
Reference:
1	Fan, B., et al., Transcriptomic profiling of Bacillus amyloliquefaciens FZB42 in response to maize root exudates. BMC Microbiol, 2012. 12: p. 116.
2	Chen, X.H., et al., Comparative analysis of the complete genome sequence of the plant growth-promoting bacterium Bacillus amyloliquefaciens FZB42. Nat Biotechnol, 2007. 25(9): p. 1007-14.
3	Rasmussen, M., M. Jacobsson, and L. Bjorck, Genome-based identification and analysis of collagen-related structural motifs in bacterial and viral proteins. J Biol Chem, 2003. 278(34): p. 32313-6.
4	Straight, P.D., J.M. Willey, and R. Kolter, Interactions between Streptomyces coelicolor and Bacillus subtilis: Role of surfactants in raising aerial structures. J Bacteriol, 2006. 188(13): p. 4918-25.
5	Kearns, D.B., et al., Genes governing swarming in Bacillus subtilis and evidence for a phase variation mechanism controlling surface motility. Mol Microbiol, 2004. 52(2): p. 357-69.
6	Branda, S.S., et al., Fruiting body formation by Bacillus subtilis. Proc Natl Acad Sci U S A, 2001. 98(20): p. 11621-6.
7	Stanley, N.R., et al., Identification of catabolite repression as a physiological regulator of biofilm formation by Bacillus subtilis by use of DNA microarrays. J Bacteriol, 2003. 185(6): p. 1951-7.
8	Kearns, D.B., et al., A master regulator for biofilm formation by Bacillus subtilis. Mol Microbiol, 2005. 55(3): p. 739-49.
9	Branda, S.S., et al., Genes involved in formation of structured multicellular communities by Bacillus subtilis. J Bacteriol, 2004. 186(12): p. 3970-9.
10	Chu, F., et al., Targets of the master regulator of biofilm formation in Bacillus subtilis. Mol Microbiol, 2006. 59(4): p. 1216-28.
11	Abramovitch, R.B., J.C. Anderson, and G.B. Martin, Bacterial elicitation and evasion of plant innate immunity. Nat Rev Mol Cell Biol, 2006. 7(8): p. 601-11.
